# Supplementary material
Source: PubMed Central journal article supplement (PMC2769203)
Supplement: NIHMS123667-supplement-1.pdf [file NIHMS123667-supplement-1.pdf]

**Supplementary Figure 1.** (a) Sequence conservation of mature miR-143 or miR-145 across species; red residues indicate variance. (b) Schematic of the genomic organization of miR-143 and miR-145 on mouse Chromosome 18; arrows indicate primers designed to amplify 1.7 kb transcript by reverse transcription of wt or *DGCR8<sup>null</sup>* cells. *Gapdh* was used as control for RNA loading and PCR performed with or without reverse transcriptase (RT). (c) Lateral view of *Islet1-cre; R26R-LacZ* lineage tracing by X-gal staining at E9.5. (d) FACS of YFP<sup>+</sup> cells from E9.5 *Islet1-cre; R26R-YFP* embryos. (e) qPCR for levels of miR-143 and miR-145 in YFP<sup>+</sup> cells relative to miR-16. N=3; \*, p<0.05. Error bars indicate standard deviation (SD). (f) qPCR of miR-143 and miR-145 cardiac expression during embryonic development relative to whole embryo. (g) miRNA copy number per cell estimates at embryonic (E) days indicated. Expression of each miRNA in post-natal day 1 (P1) or P8 ventricles relative to liver is shown.

**Supplementary Figure 2.** (a) Percent identity between mouse and human across a 4.2 kb genomic region upstream of miR-143/145 cloned into an Hsp68-LacZ cassette. (b)  $\beta$ -Gal activity illustrating LacZ expression in the intestines of an E15.5 mouse embryo. (c) section of boxed area in (b) showing expression in smooth muscle (sm) of intestinal wall and in the vasculature. (d) qPCR of miR-143 and miR-145 in adult heart or aorta relative to liver. n=3; \*, p<0.05. Error bars indicate standard deviation (SD).

**Supplementary Figure 3.** (a) Summary of the deletion and mutation analyses of the upstream enhancer region of miR-143/145. Asterisks (\*) indicate mutations in the SRF or Nkx2.5 binding sites. Construct corresponds to images of  $\beta$ -gal activity focused on heart region (see Figs. 1, 2a–e). (b) Putative SRF and Nkx2.5 binding sites (green sequence)

within the 0.9 kb *cis*-regulatory element of miR-143 and miR-145. (c) LacZ expression of the 0.9 kb *cis*-acting regulatory element was present in the smooth muscle of the aorta, but a mutation of the SRF binding site eliminated enhancer activity. (d) Electrophoretic mobility-shift assay using radiolabeled probe for the SRF binding site. Competition with cold wild type (WT) or mutant (MT) probe indicates specificity of band.

**Supplementary Figure 4.** (a) Cross-sections from mice 21 days post-ligation of the left carotid artery compared to the contralateral right carotid artery without ligation (control). Immunohistochemistry revealed that smooth muscle (Sm)  $\alpha$ -actin staining (red) was reduced in the ligated vessel compared to control. miR-143 and miR-145 expression (DIG-AP staining, dark purple) was markedly reduced in the ligated artery. (b) qPCR results of miR-29a, miR-143 or miR-145 expression in the border zone (BZ) or infarct zone (IZ) of mouse hearts after coronary ligation, relative to the non-ischemic distal zone (DZ) away from the infarct area (n=3). Error bars indicate SD.

**Supplementary Figure 5.** (a) qPCR of smooth muscle markers in fibroblasts treated with 250 ng Myocd with or without anti-miR-145 or (b) miR-143 (n=4). (c) qPCR of smooth muscle markers in fibroblasts treated with 50 ng of Myocd with or without miR-143 (n=4). (d) Immunocytochemistry of smooth muscle  $\alpha$ -actin in Joma1.3 neural crest cells treated with tamoxifen (+4OHT) or miR-143. (e) qPCR of smooth muscle markers in neural crest cells (NCCs) with or without miR-143 (n=6). Slug and p75 represent markers of undifferentiated NCCs.

**Supplementary Figure 6.** (a) Sequence complementarity of two miR-143 or miR-145 binding sites in mouse *Elk-1* or *Myocd* 3' UTRs, respectively. (b) qPCR of *Elk-1* mRNA levels (n=4). (c) Putative miR-145 binding site in the mouse 3' UTR of *Klf4*. (d) qPCR of *Klf4* mRNA levels (n=4). (e) Putative binding site in the mouse 3' UTR of *CamkII- $\delta$* . (f, g) Relative luciferase activity of indicated 3' UTRs downstream of luciferase (n=3). Predicted binding sites within the UTRs are indicated with residues complementary to miR-143 indicated in red capital letters. (e) Relative luciferase activity of indicated 3' UTRs downstream of luciferase with or without miR-145 (n=3). Predicted binding sites within the UTRs are indicated with residues complementary to miR-145 indicated in red capital letters. No significant changes in luciferase activity were observed with any of these 3' UTRs. Error bars indicate SD.

**Supplementary Figure 7.** (a) qPCR of miR-145 expression and (b) markers of smooth muscle differentiation in 9-day post-injured carotid arteries transduced with either lenti-control-GFP or lenti-miR-145-GFP viruses (n=3). Smooth muscle  $\alpha$ -actin (Sm- $\alpha$ -actin); Sm-mhc, smooth muscle myosin heavy chain. Error bars indicate SD.

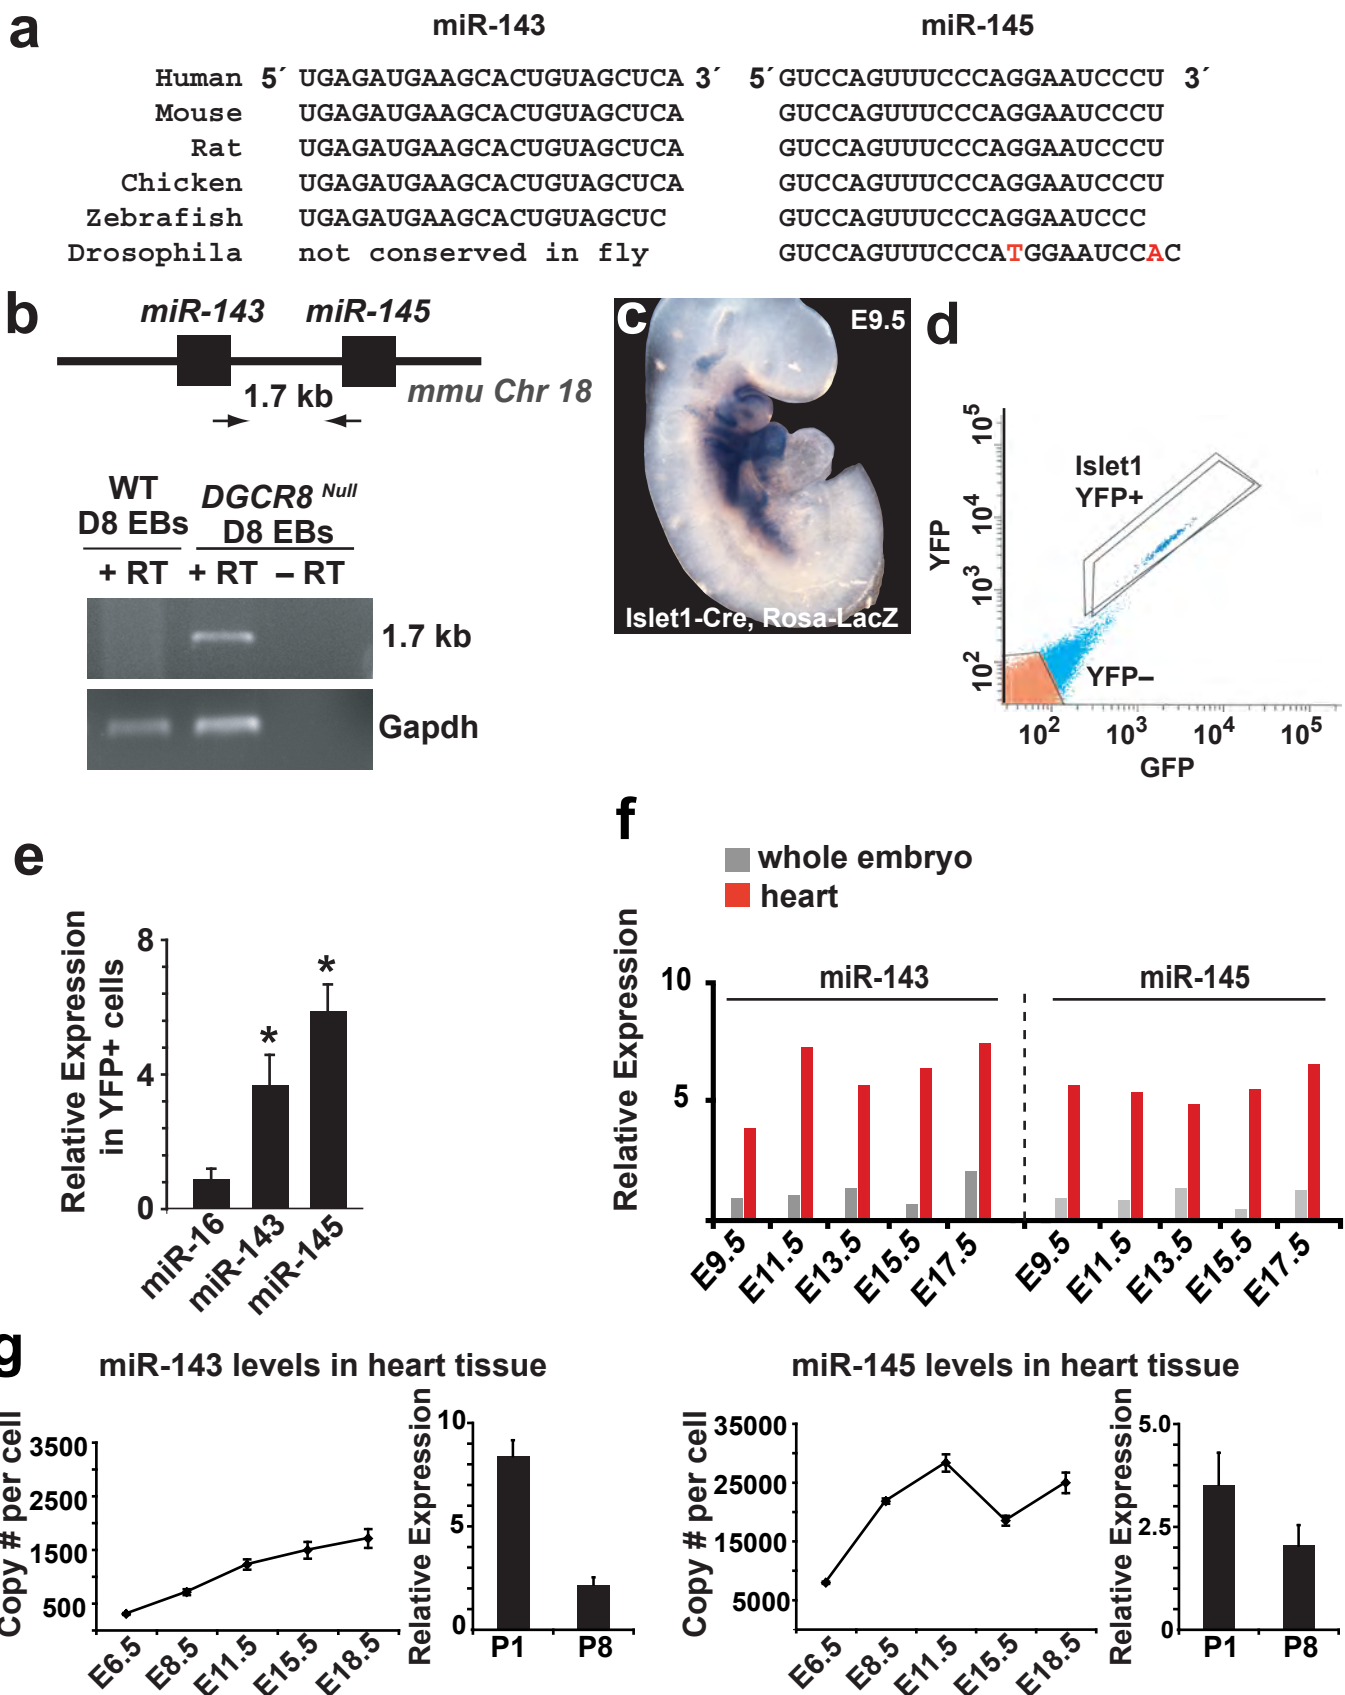

**a**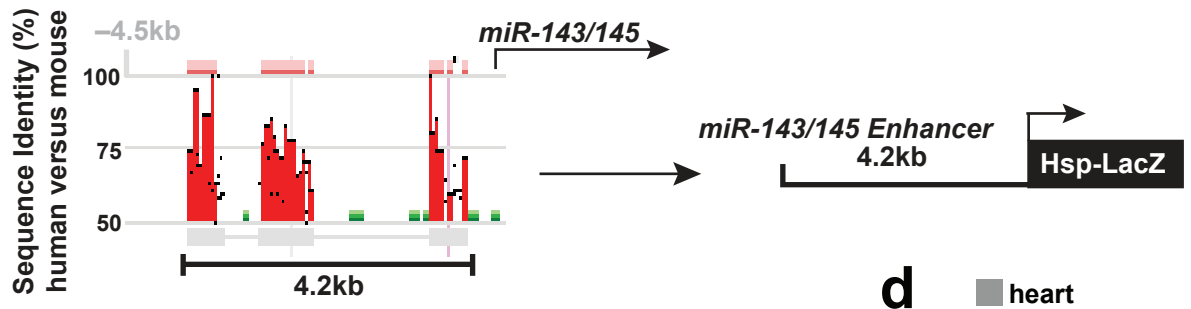**b**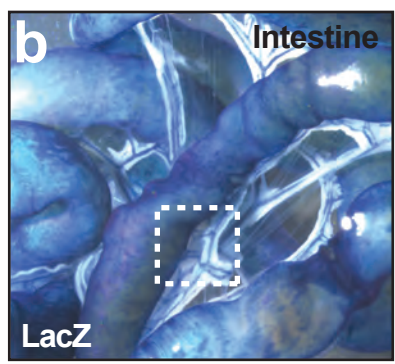**c**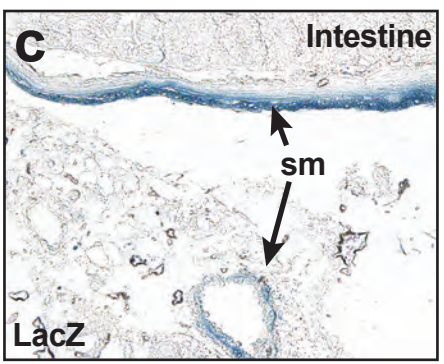**d**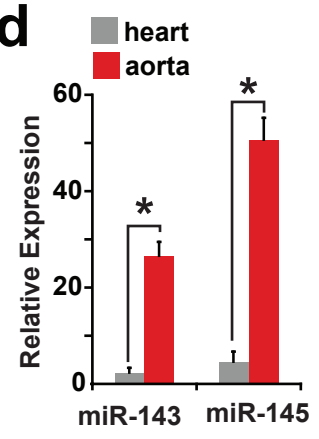

Supplementary Fig. 2

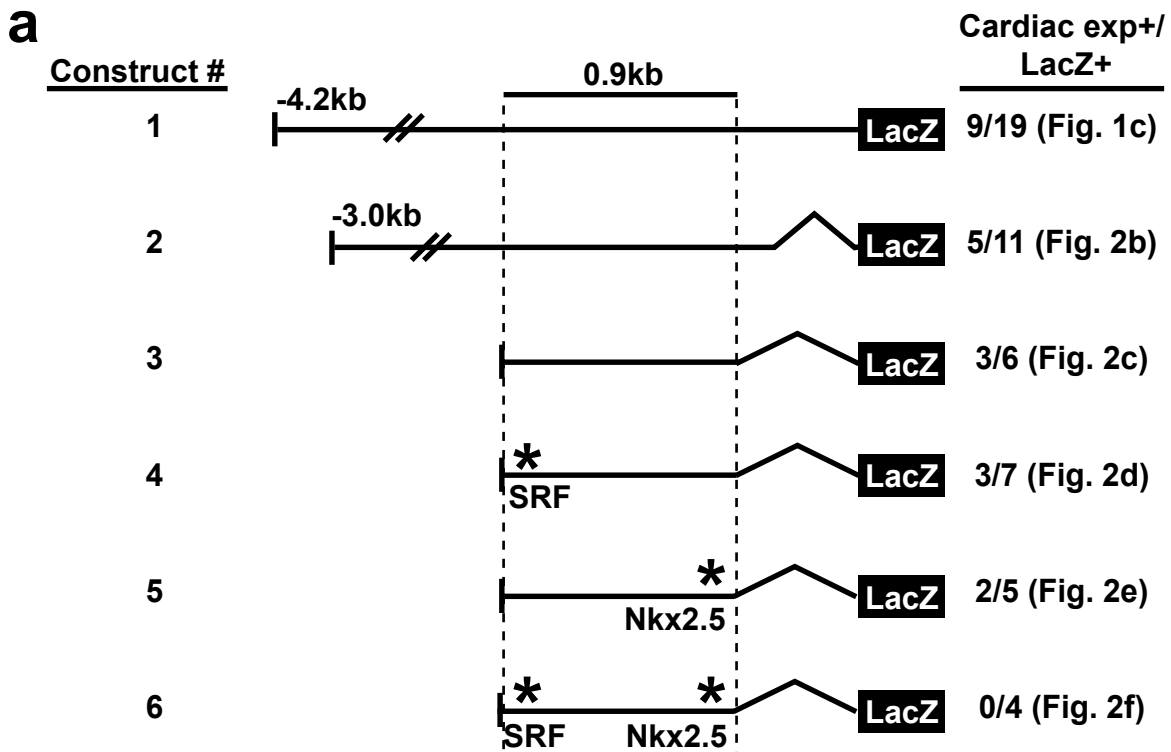

**b**

SRF binding site

GGGAGCAGCCTTGCCATATAAGGGCAGGAGCCCC mmu chr 18: 61812158

SRF<sup>mut</sup> binding site

GGGAGCAGCCTTGCTACCGCAGGGCAGGAGCCCC

Nkx2.5 binding site

GGGAAAGACTGCCAAGTGCTCGTGGCC mmu chr 18: 61811308

Nkx2.5<sup>mut</sup> binding site

GGGAAAGACTGCCGTGAGCTCGTGGCC

**c**

0.9 kb-WT

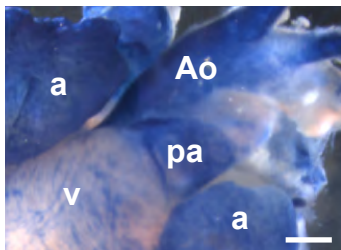

0.9 kb-SRF<sup>mut</sup>

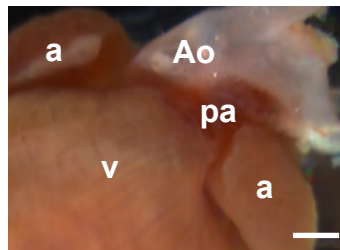

**d**

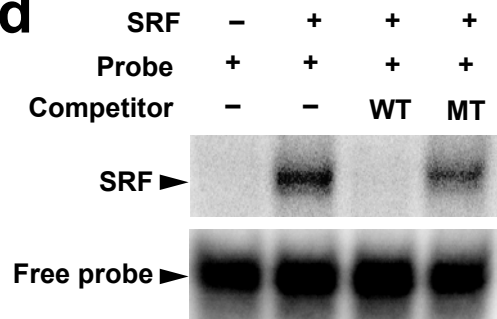

Supplementary Fig. 3

**a**

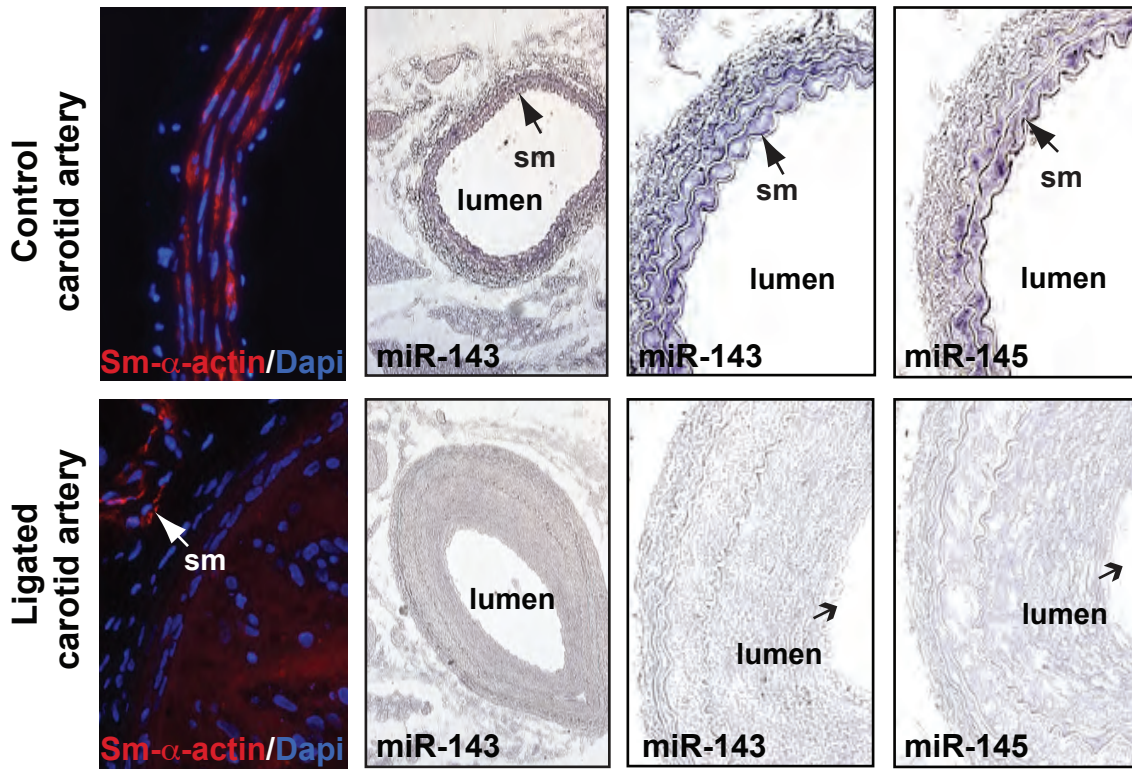

**b**

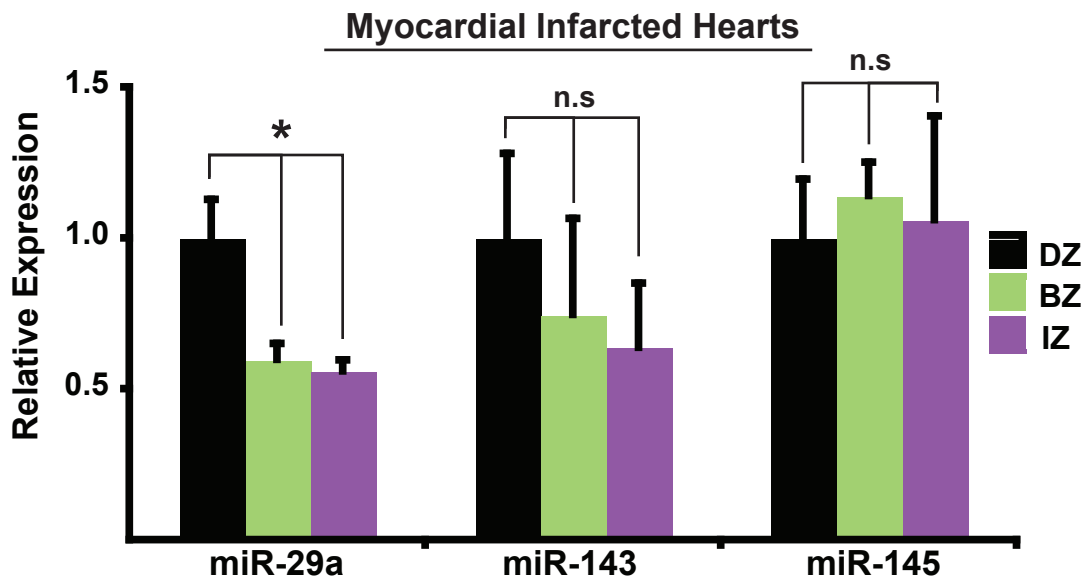

# Supplementary Fig. 5

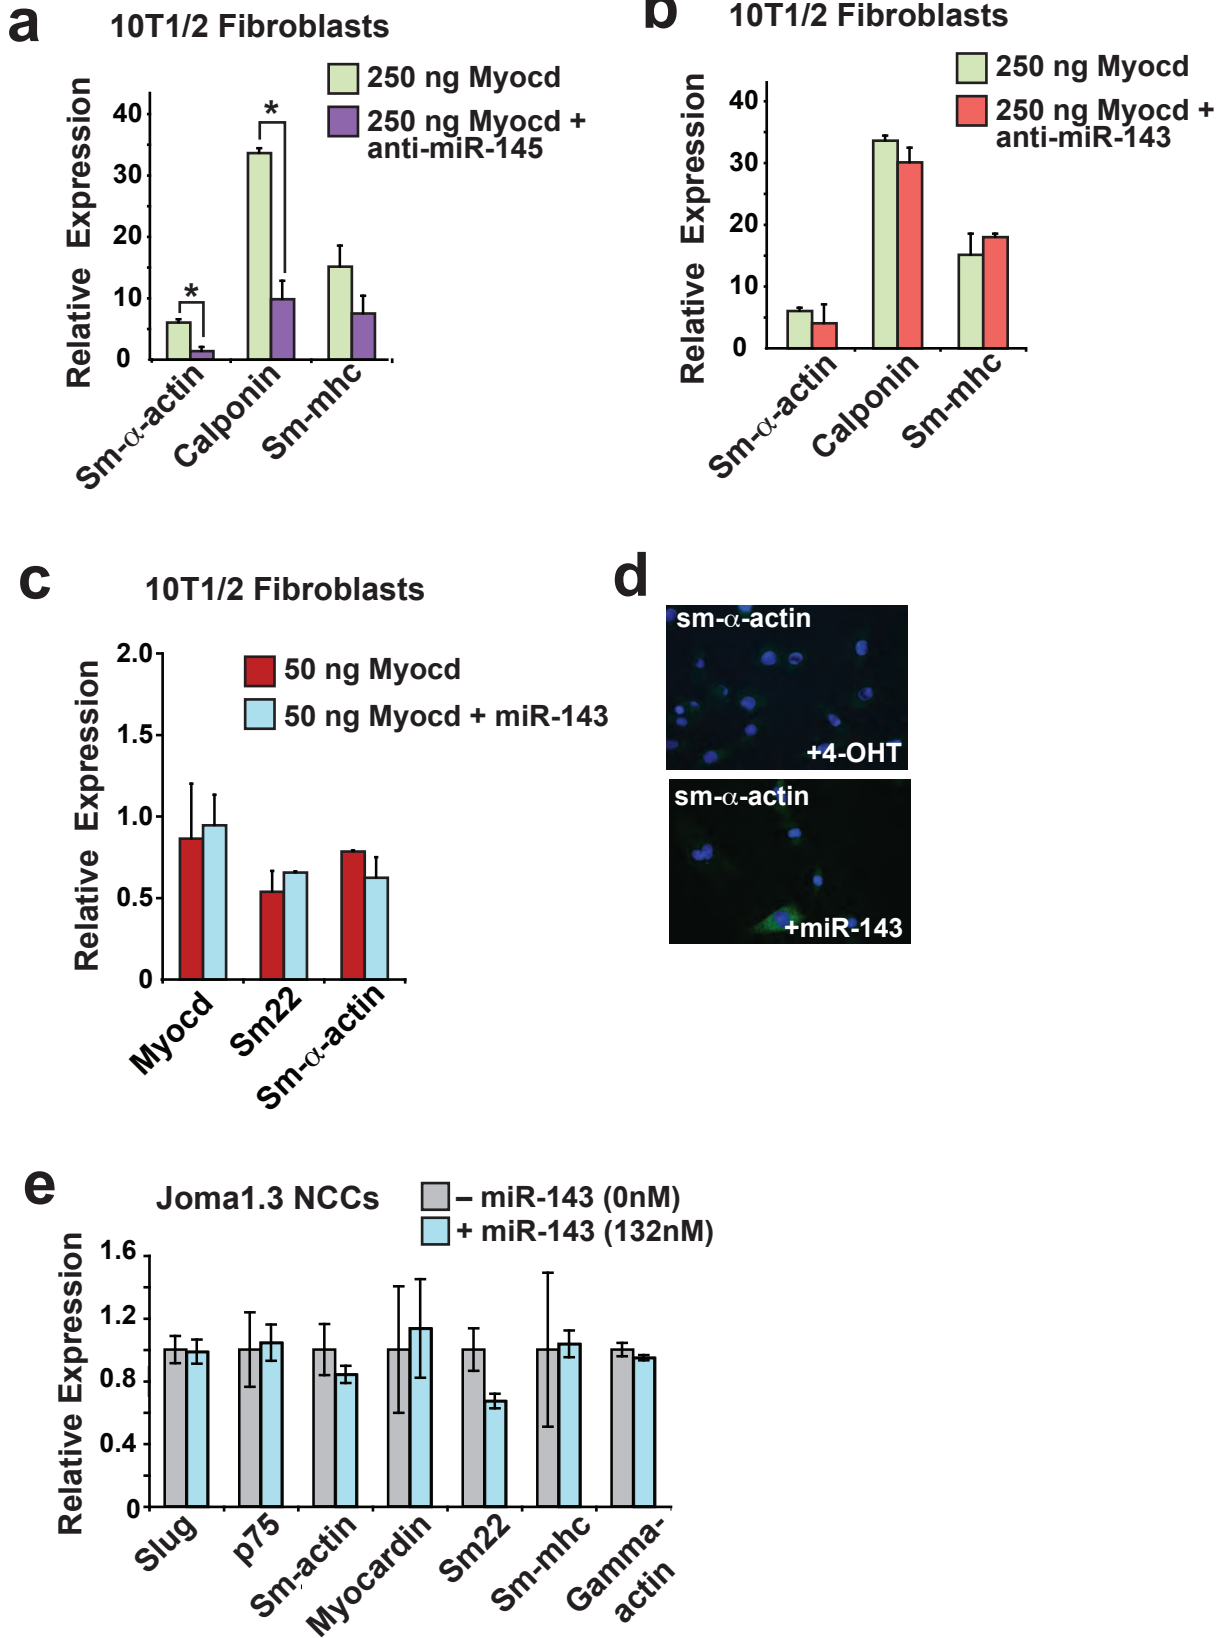



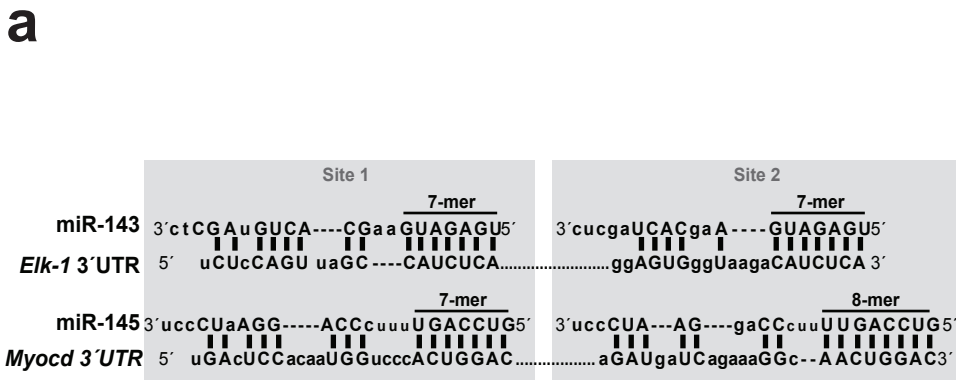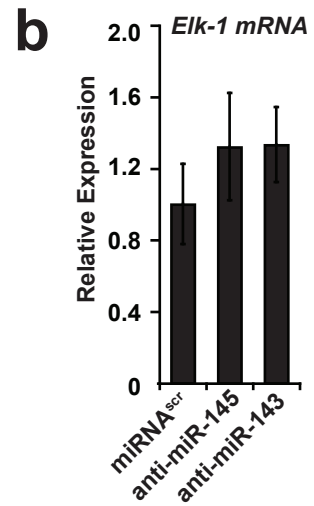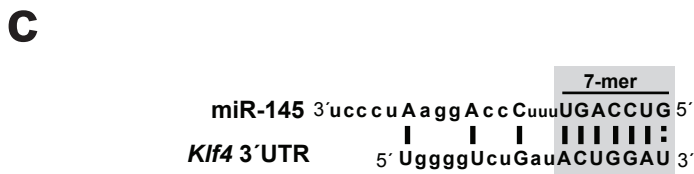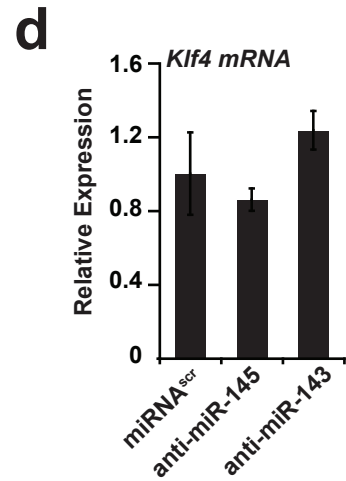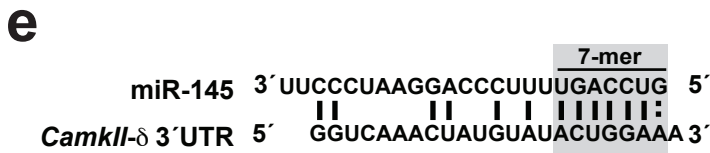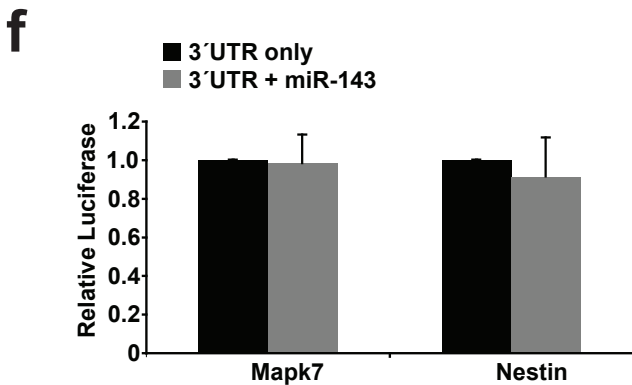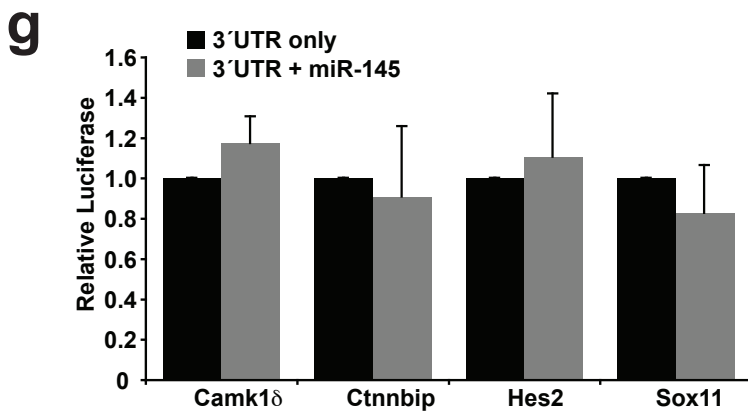

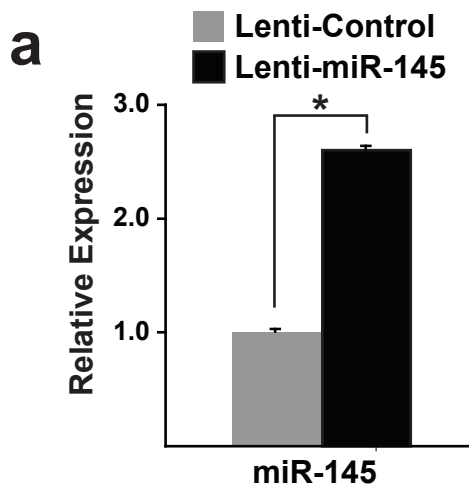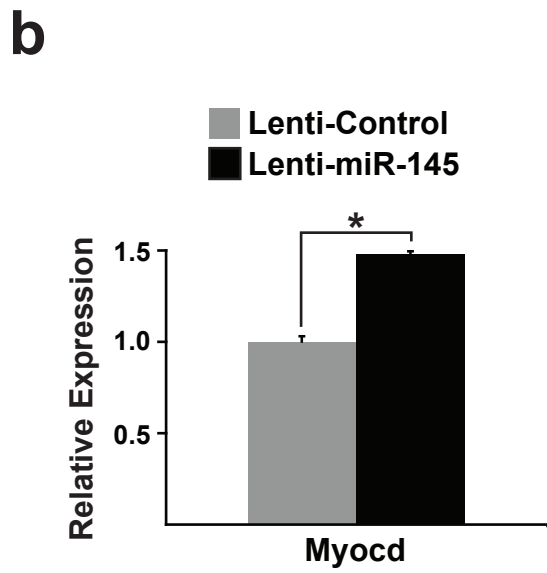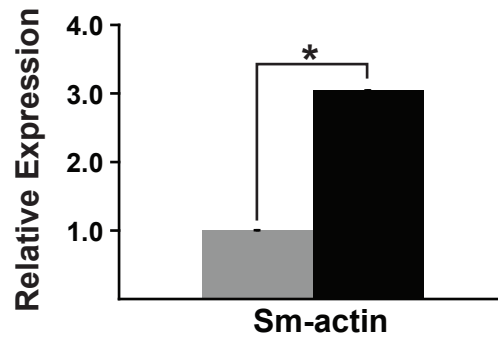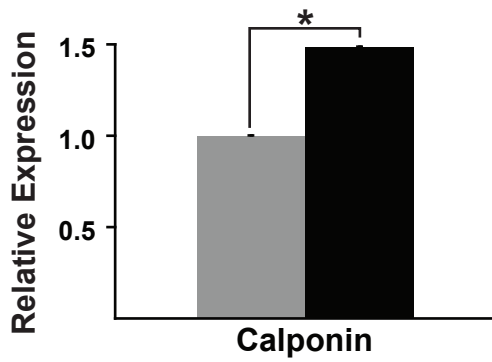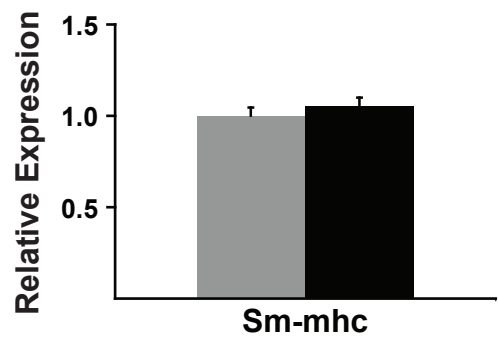

**Supplementary Fig. 7**
